# Supplementary material for: A wearable DC tribovoltaic power textile woven by P/N-type organic semiconductor fibers
Source: Royal Society of Chemistry journal article supplement (doi:10.1039/d4ee02662d), 2024-01-01
Supplement: d4ee02662d1.pdf [file d4ee02662d1.pdf]

## **A wearable DC tribovoltaic power textile woven by P/N-type organic semiconductor fibers**

Beibei Fan <sup>a,c</sup>, Guoxu Liu <sup>a,b</sup>, Yiming Dai <sup>a,c</sup>, Zefang Dong <sup>a,b</sup>, Ruifei Luan <sup>a,b</sup>, Likun Gong <sup>a,b</sup>, Zhi Zhang <sup>a,b</sup>, Zhong Lin Wang <sup>a,b,d,e</sup>, Chi Zhang <sup>a,b,c</sup> \*

*<sup>a</sup> CAS Center for Excellence in Nanoscience, Beijing Key Laboratory of Micro-nano Energy and Sensor, Beijing Institute of Nanoenergy and Nanosystems, Chinese Academy of Sciences, Beijing 101400, China*

*<sup>b</sup> School of Nanoscience and Technology, University of Chinese Academy of Sciences, Beijing 100049, China*

*<sup>c</sup> Center on Nanoenergy Research, School of Physical Science and Technology, Guangxi University, Nanning, 530004, China*

*<sup>d</sup> Georgia Institute of Technology, Atlanta, GA, USA*

*<sup>e</sup> Guangzhou Institute of Blue Energy, Knowledge City, Huangpu District, Guangzhou 510555, China*

\* Corresponding author at: Tribotronics Research Group, Beijing Institute of Nanoenergy and Nanosystems, Chinese Academy of Sciences

E-mail addresses: czhang@binn.cas.cn (C. Zhang)

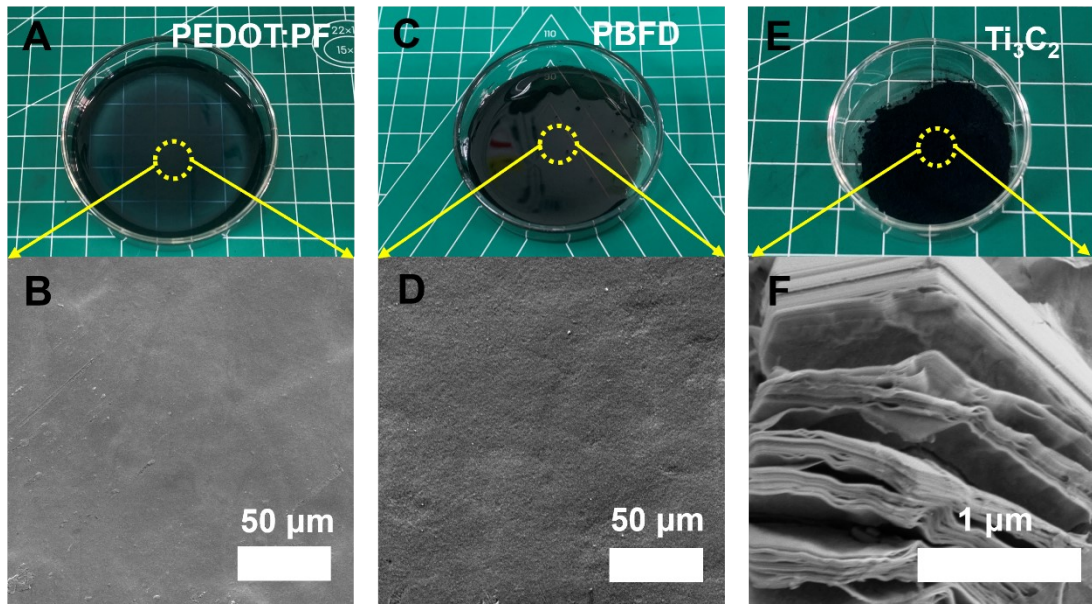

**Fig. S1** | (A, B) PEDOT:PF solution and SEM image of PEDOT:PF. (C, D) PBFD solution and SEM image of PBFD. (E, F)  $\text{Ti}_3\text{C}_2$  powder and SEM image of  $\text{Ti}_3\text{C}_2$ .

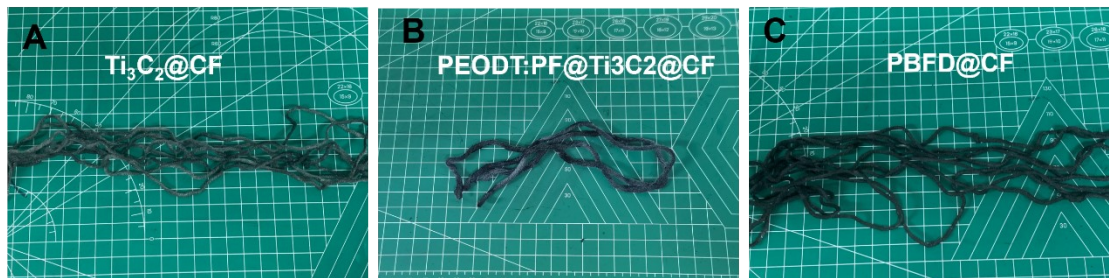

**Fig. S2** | (A)  $\text{Ti}_3\text{C}_2$ @CFs fibers. (B) PEDOT:PF@ $\text{Ti}_3\text{C}_2$ @CFs fibers. (C) PBFD@CFs fibers.

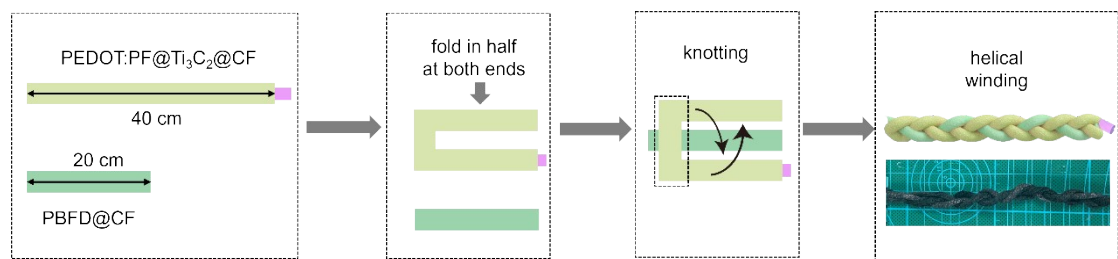

**Fig. S3** | The weaving manufacturing process of SFs.

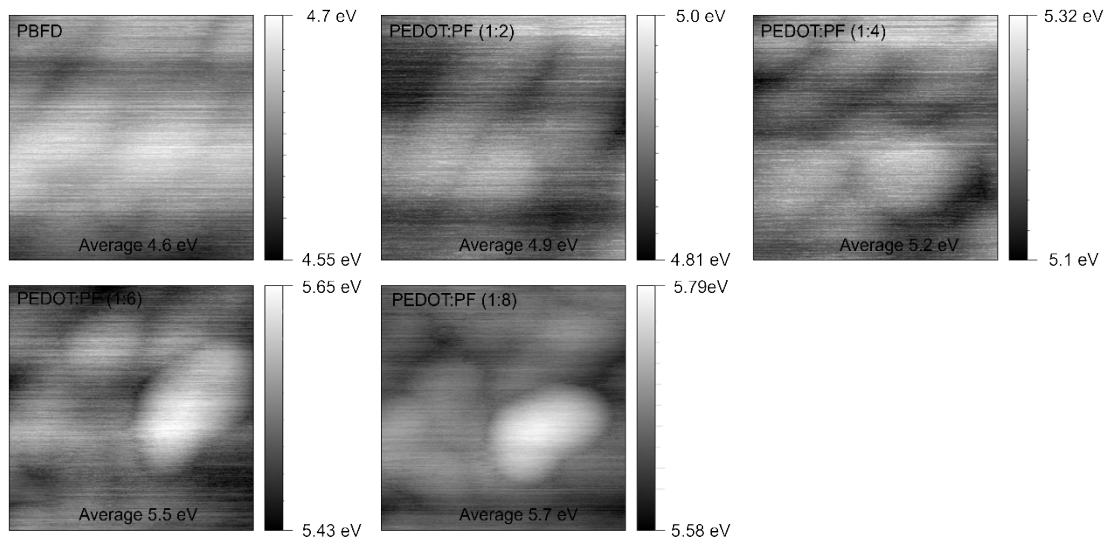

Fig. S4 | Work function measurements of PBFD and PEDOT:PF from KPFM tests.

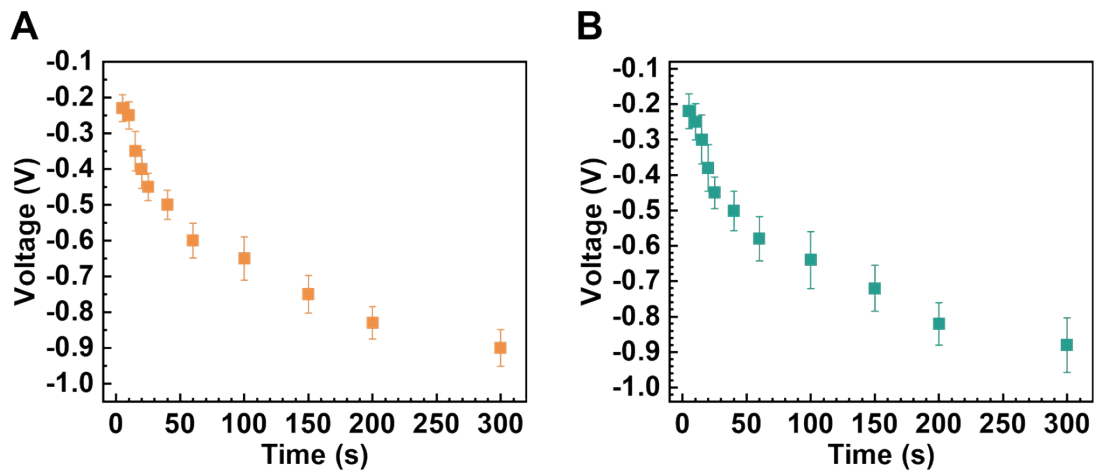

Fig. S5 | (A) The surface potential of of PEDOT:PF in sliding state. (B) The surface potential of of PEDOT:PF in compression state.

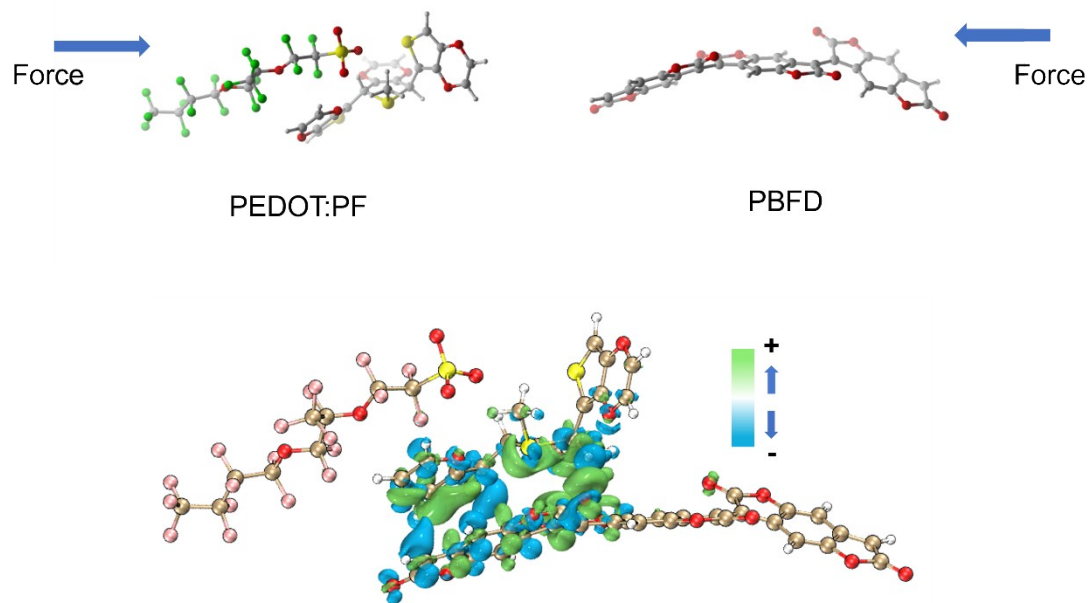

**Fig. S6** | The distribution of gain and loss electrons at the interface between PBFD and PEDOT:PF molecules.

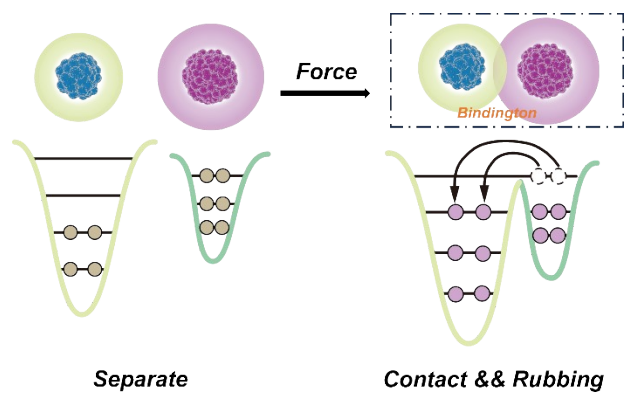

**Fig. S7** | Electron-cloud-potential-well model of the electron transition process and the release of “bindington” as the excitation energy of the tribovoltaic effect.

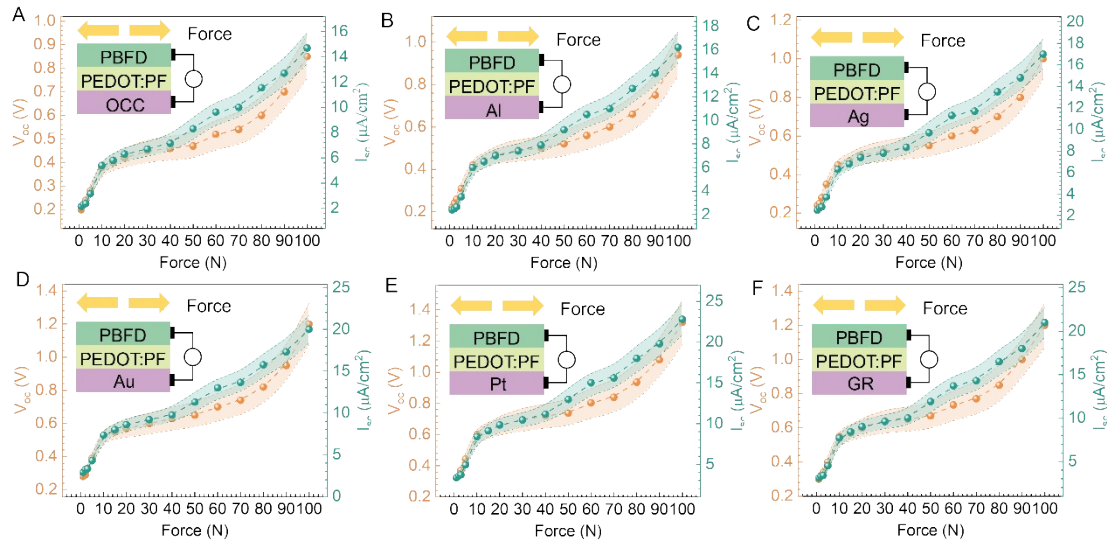

**Fig. S8** |  $V_{oc}$  and  $I_{sc}$  of sliding mode generated by PEDOT:PF/PBFD interface under different materials.

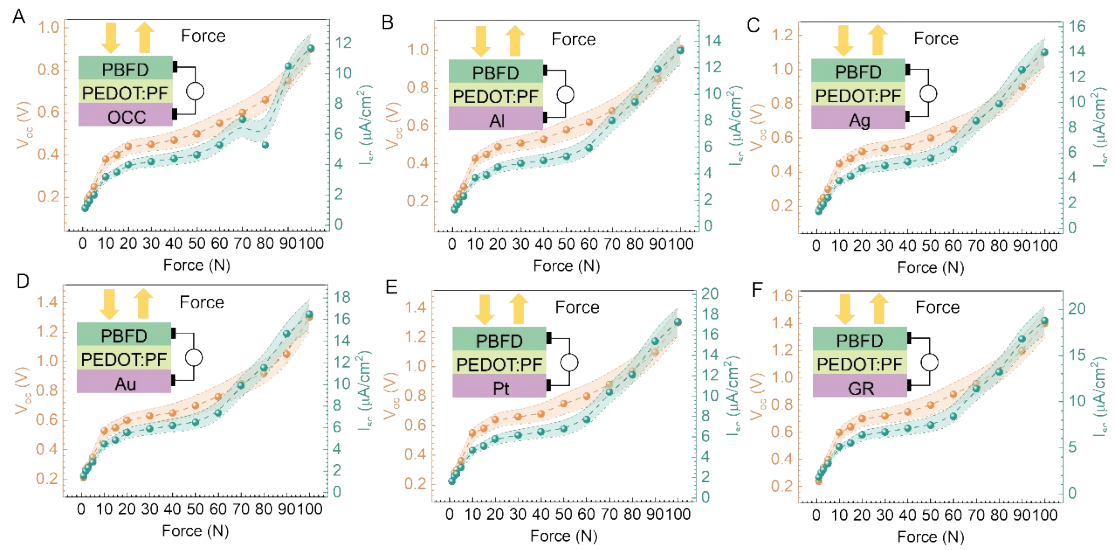

**Fig. S9** |  $V_{oc}$  and  $I_{sc}$  of compression mode generated by PEDOT:PF/PBFD interface under different materials.

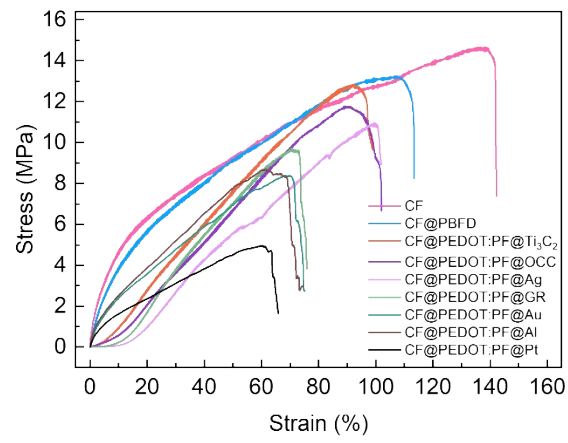

**Fig. S10** | The tensile-strain curves of different fibers.

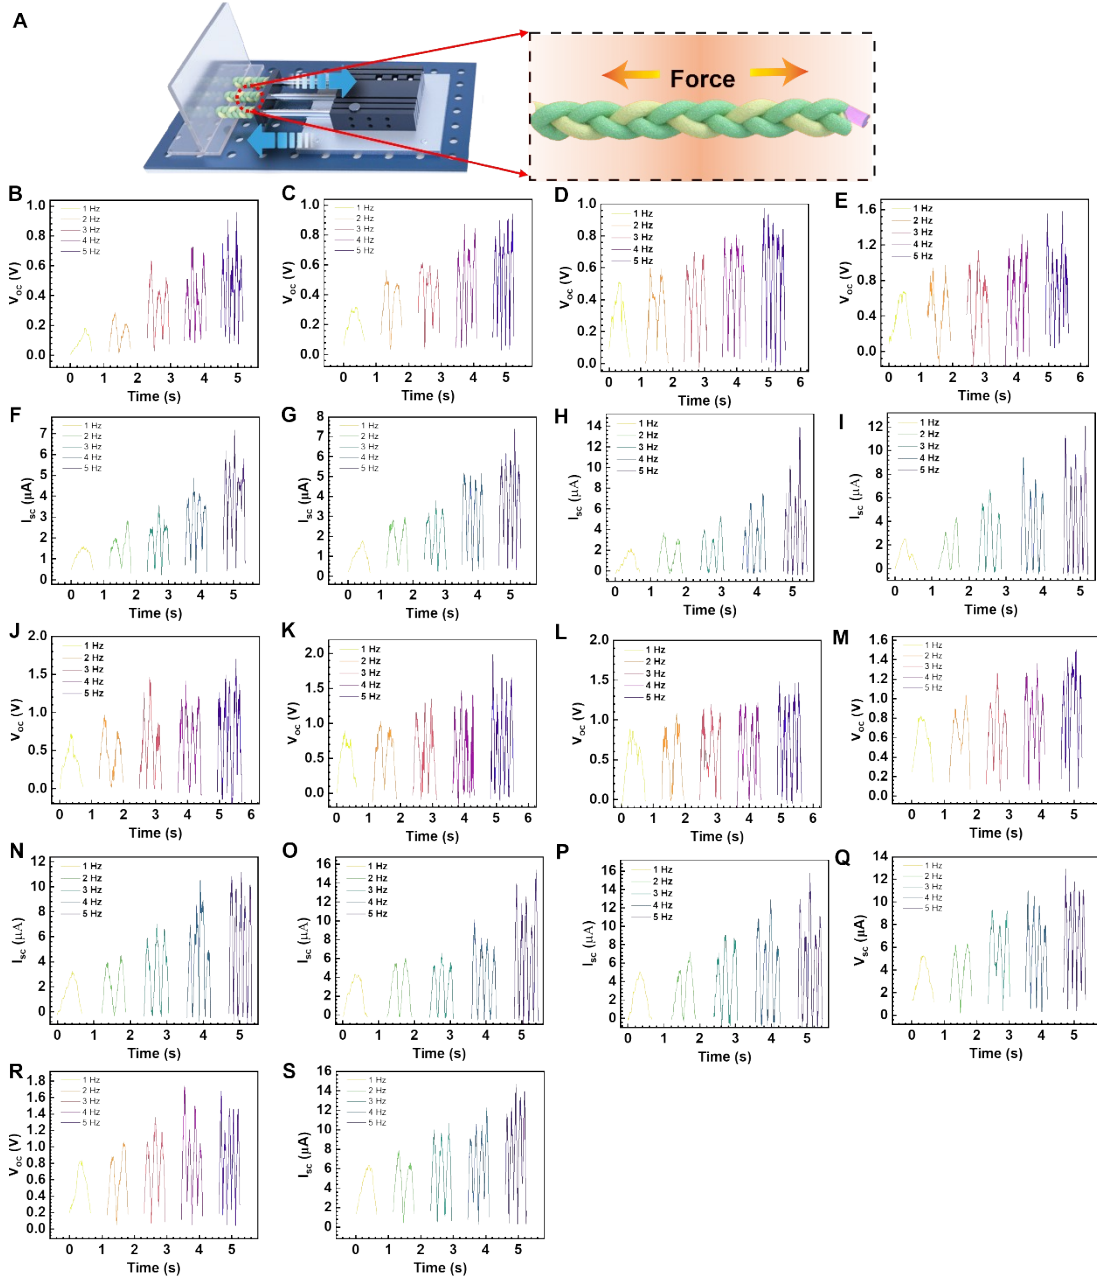

**Fig. S11** | (A) Schematic diagram of SFs electrical output tested in the tensile state. (B, F) The  $V_{oc}$  and  $I_{sc}$  of SFs based 0.2 mm CFs. (C, G) The  $V_{oc}$  and  $I_{sc}$  of SFs based 0.5 mm CFs. (D, H) The  $V_{oc}$  and  $I_{sc}$  of SFs based 1 mm CFs. (E, I) The  $V_{oc}$  and  $I_{sc}$  of SFs based 2 mm CFs. (J, N) The  $V_{oc}$  and  $I_{sc}$  of SFs based 3 mm CFs. (K, O) The  $V_{oc}$  and  $I_{sc}$  of SFs based 4 mm CFs. (L, P) The  $V_{oc}$  and  $I_{sc}$  of SFs based 5 mm CFs. (M, Q) The  $V_{oc}$  and  $I_{sc}$  of SFs based 7 mm CFs. (R, S) The  $V_{oc}$  and  $I_{sc}$  of SFs based 10 mm CFs.

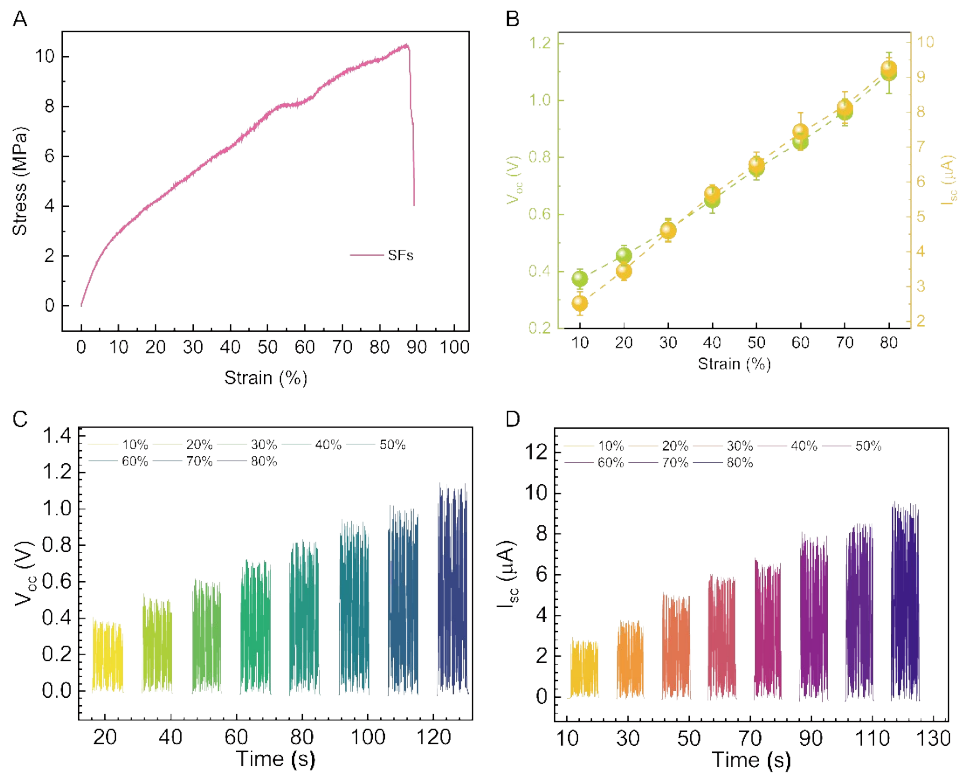

**Fig. S12** | (A) The tensile-strain curves of SFs. (B- D) The  $V_{oc}$  and  $I_{sc}$  of SFs at 10-80% -strain.



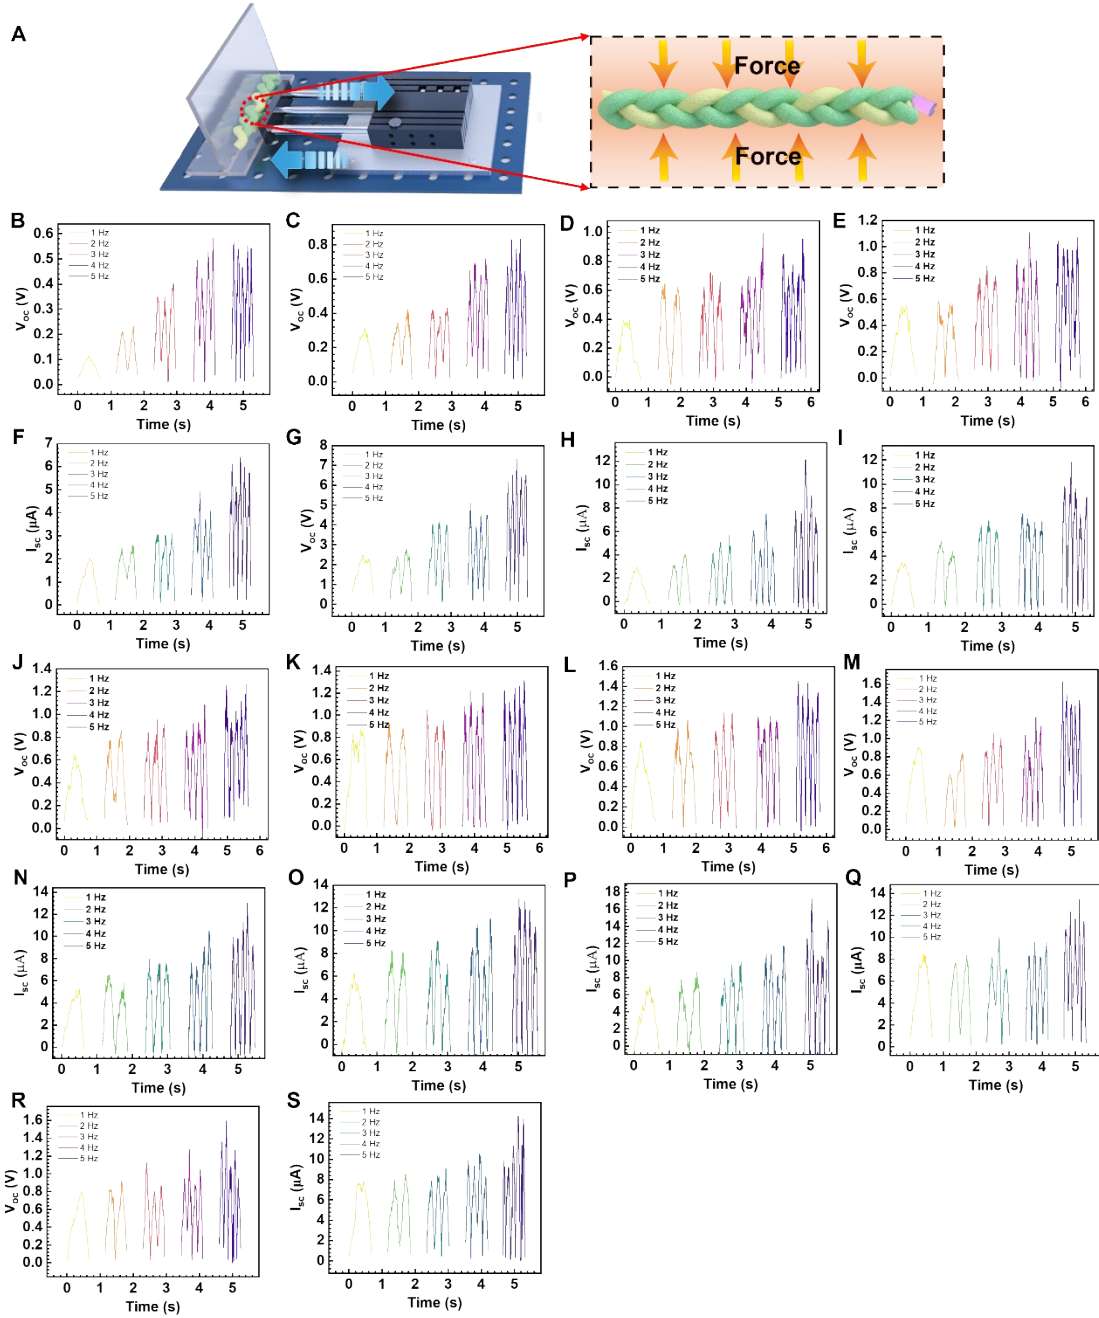

**Fig. S13** | (A) Schematic diagram of SFs electrical output tested in the compression state. (B, F) The  $V_{oc}$  and  $I_{sc}$  of SFs based 0.2 mm CFs. (C, G) The  $V_{oc}$  and  $I_{sc}$  of SFs based 0.5 mm CFs. (D, H) The  $V_{oc}$  and  $I_{sc}$  of SFs based 1 mm CFs. (E, I) The  $V_{oc}$  and  $I_{sc}$  of SFs based 2 mm CFs. (J, N) The  $V_{oc}$  and  $I_{sc}$  of SFs based 3 mm CFs. (K, O) The  $V_{oc}$  and  $I_{sc}$  of SFs based 4 mm CFs. (L, P) The  $V_{oc}$  and  $I_{sc}$  of SFs based 5 mm CFs. (M, Q) The  $V_{oc}$  and  $I_{sc}$  of SFs based 7 mm CFs. (R, S) The  $V_{oc}$  and  $I_{sc}$  of SFs based 10 mm CFs.

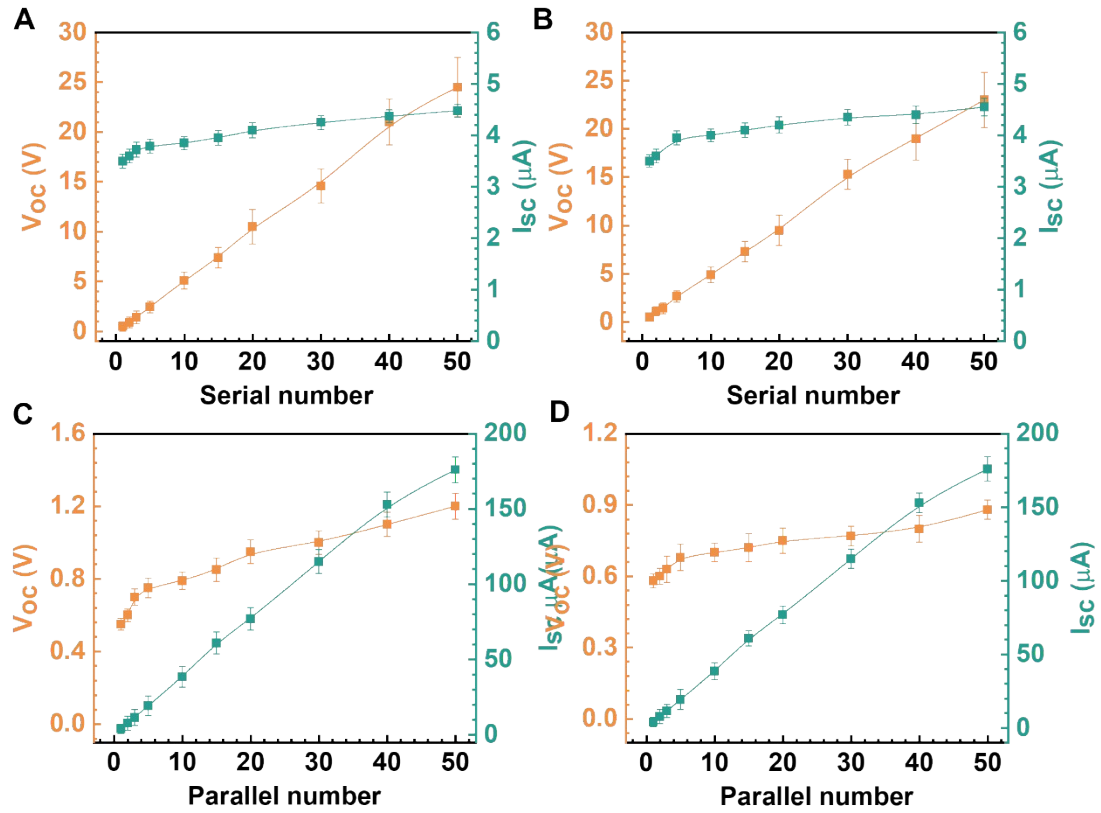

**Fig. S14** | (A, B) The Serial  $V_{oc}$  and  $I_{sc}$  of SFs in in the tensile state and compression state. (C, D) The Parallel  $V_{oc}$  and  $I_{sc}$  of SFs in in the tensile state and compression state.

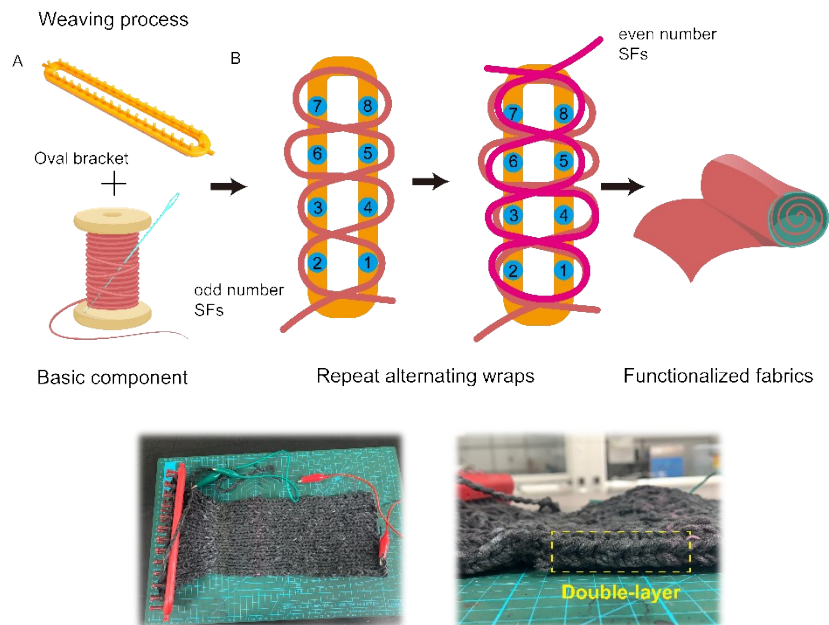

**Fig. S15** | The weaving manufacturing process of WDPs.

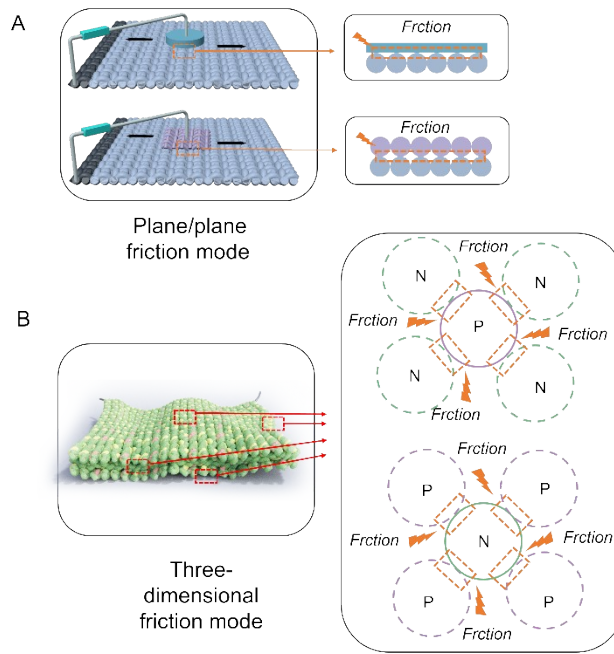

**Fig. S16** | Comparison of plane/plane mode and three-dimensional friction mode

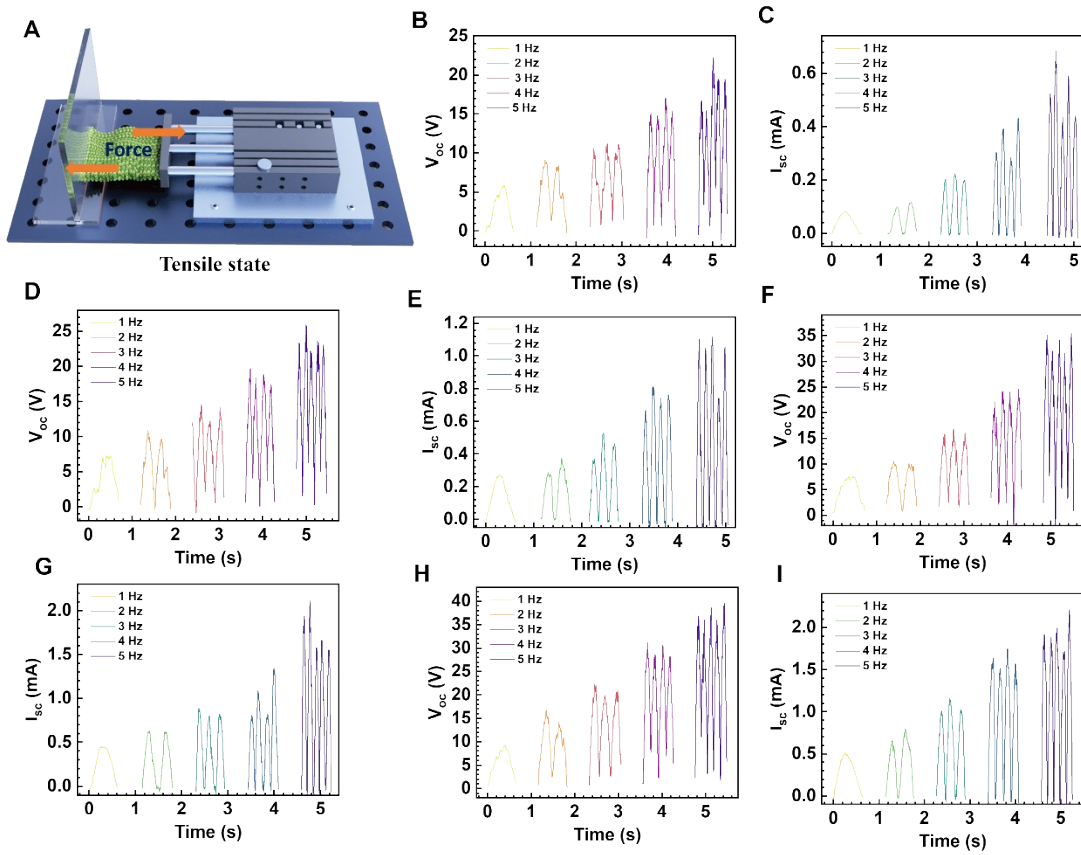

**Fig. S17** | The  $V_{oc}$  and  $I_{sc}$  of WDPs in tensile state. (A) Schematic diagram of WDPs electrical output tested in the tensile state. (B, C) The  $V_{oc}$  and  $I_{sc}$  of  $5 \times 10$  cm<sup>2</sup> WDPs. (D, E) The  $V_{oc}$  and  $I_{sc}$  of  $10 \times 10$  cm<sup>2</sup> WDPs. (F, G) The  $V_{oc}$

and  $I_{sc}$  of  $10 \times 20 \text{ cm}^2$  WDPs. (H, I) The  $V_{oc}$  and  $I_{sc}$  of  $10 \times 30 \text{ cm}^2$  WDPs.

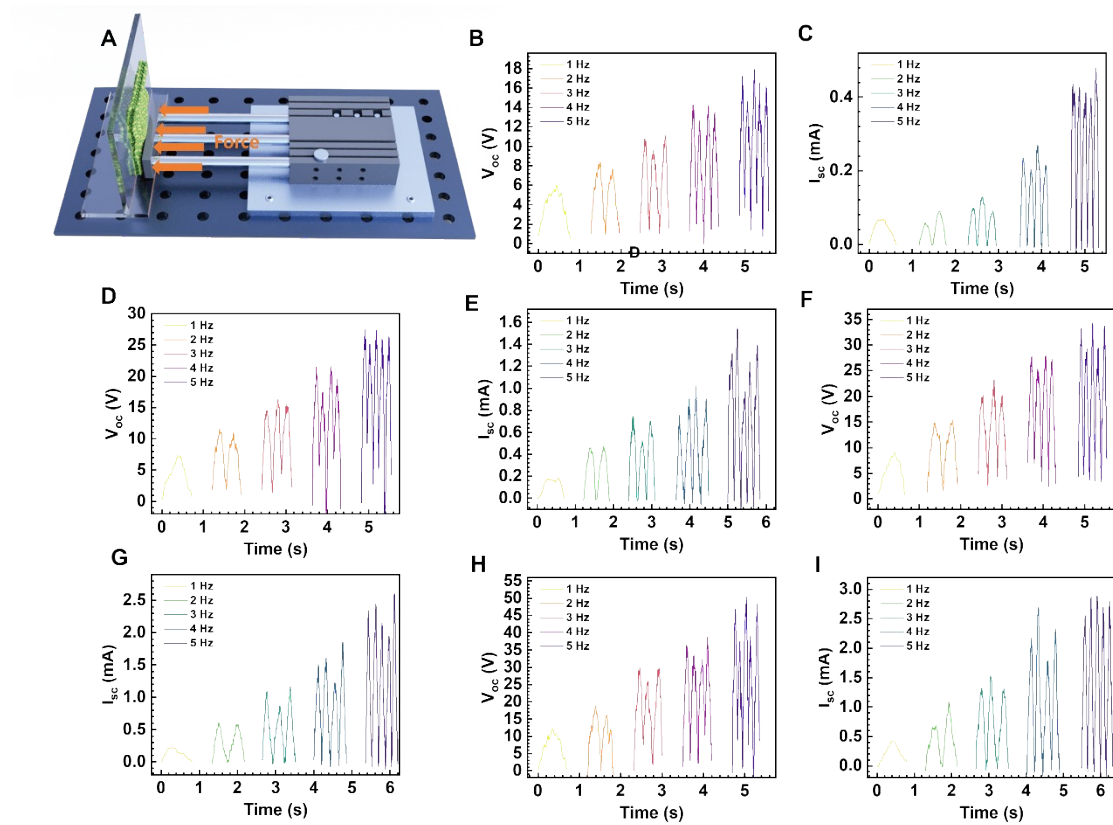

**Fig. S18 | The  $V_{oc}$  and  $I_{sc}$  of WDPs in compression state.** (A) Schematic diagram of WDPs electrical output tested in the compression state. (B, C) The  $V_{oc}$  and  $I_{sc}$  of  $5 \times 10 \text{ cm}^2$  WDPs. (D, E) The  $V_{oc}$  and  $I_{sc}$  of  $10 \times 10 \text{ cm}^2$  WDPs. (F, G) The  $V_{oc}$  and  $I_{sc}$  of  $10 \times 20 \text{ cm}^2$  WDPs. (H, I) The  $V_{oc}$  and  $I_{sc}$  of  $10 \times 30 \text{ cm}^2$  WDPs.

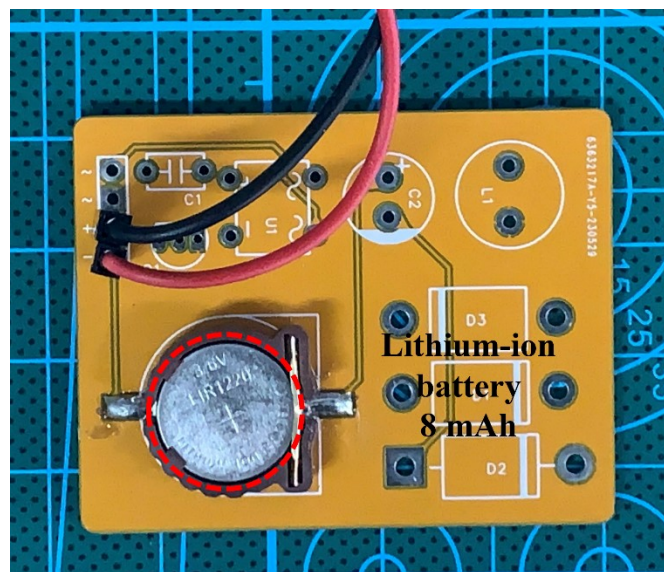

**Fig. S19 | The Lithium-ion battery device.**

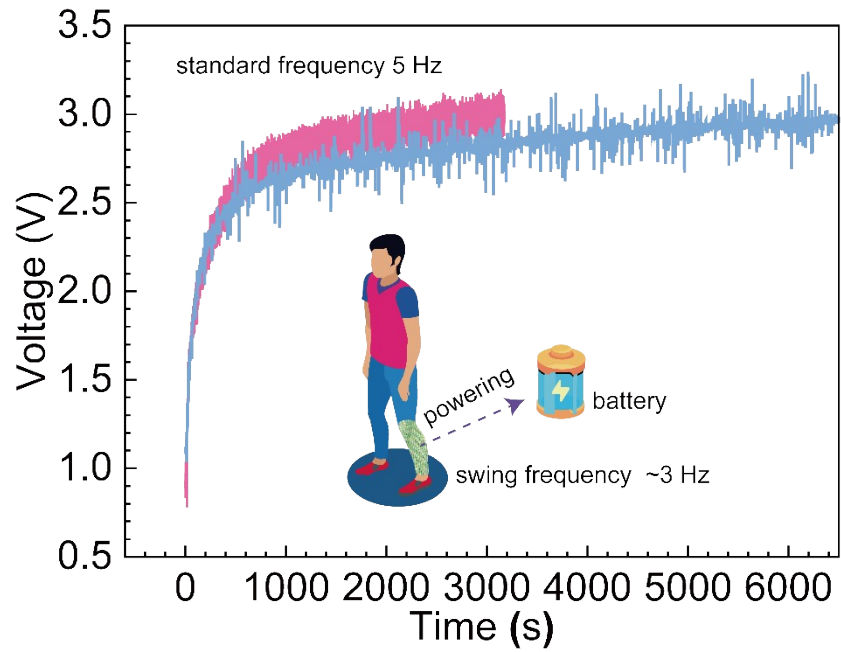

**Fig. S20** | Comparison of the charging of batteries by the kinetic energy collected by WDP at 5Hz and the charging of batteries by collecting normal human kinetic energy

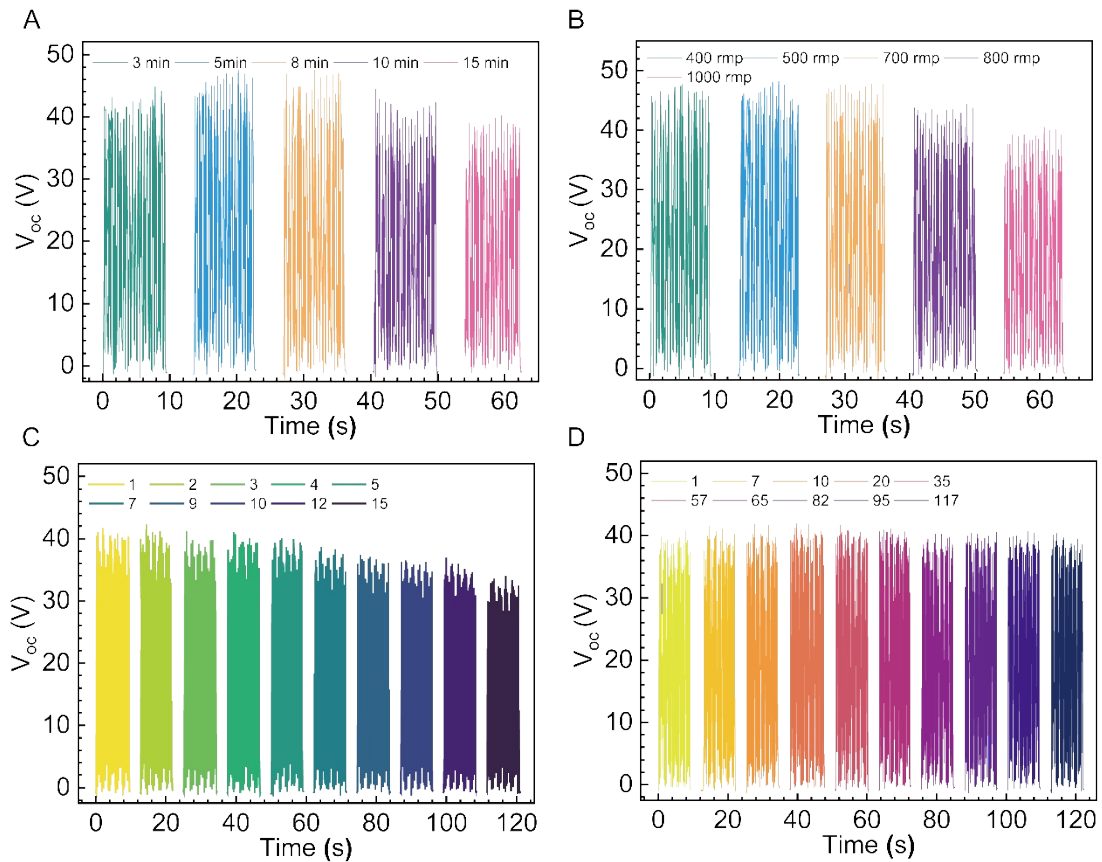

**Fig. S21** | The investigation of WDPs' cycle washability and long-term durability.

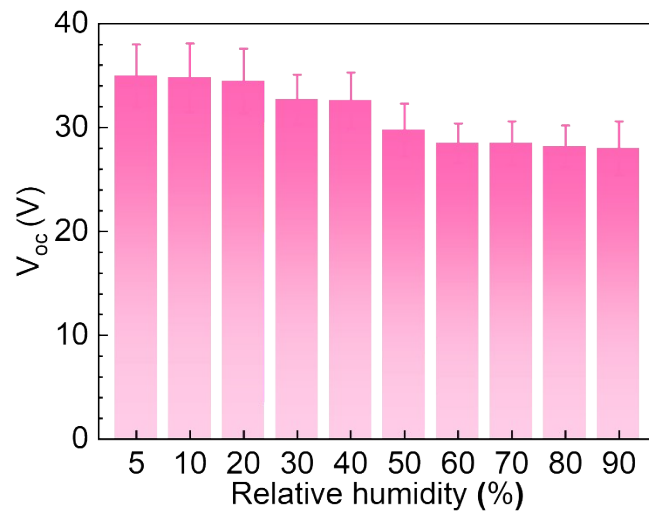

**Fig. S22** | The influence of environmental humidity on the electrical output of WDPs.

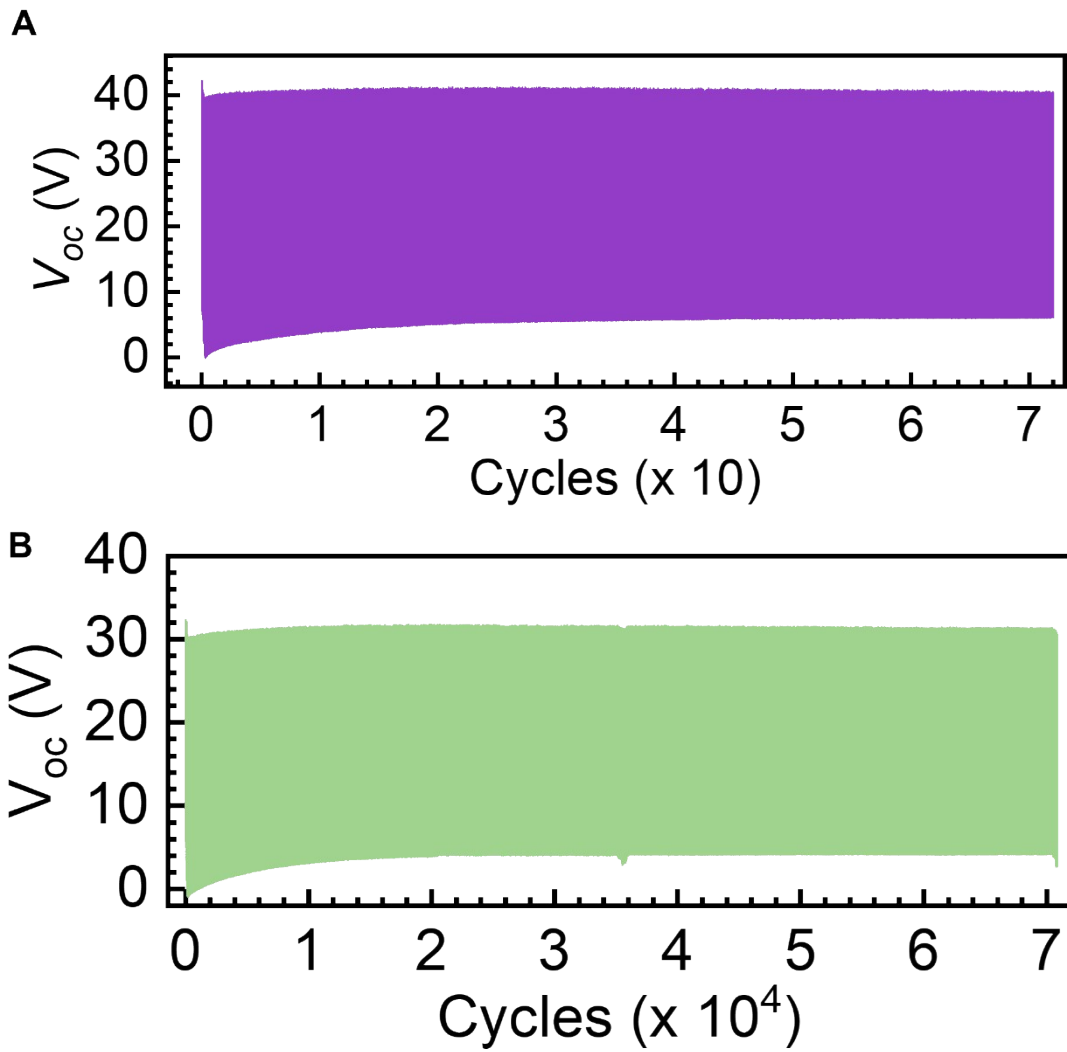

Fig. S23 | (A) The durability test of WDPs in compression state. (B) The durability test of WDPs in tensile state.

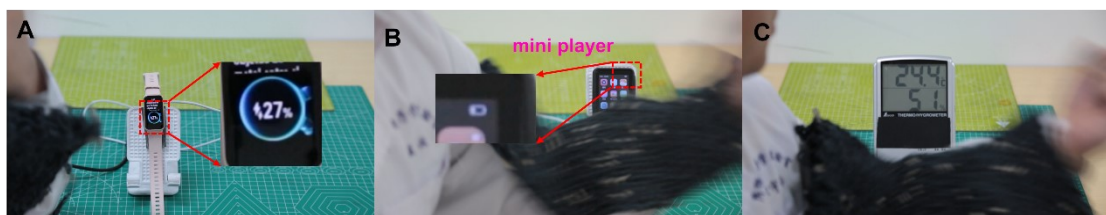

Fig. S24 | The demonstration of driving a smart bracelet, a mini player and a thermohygrometer.

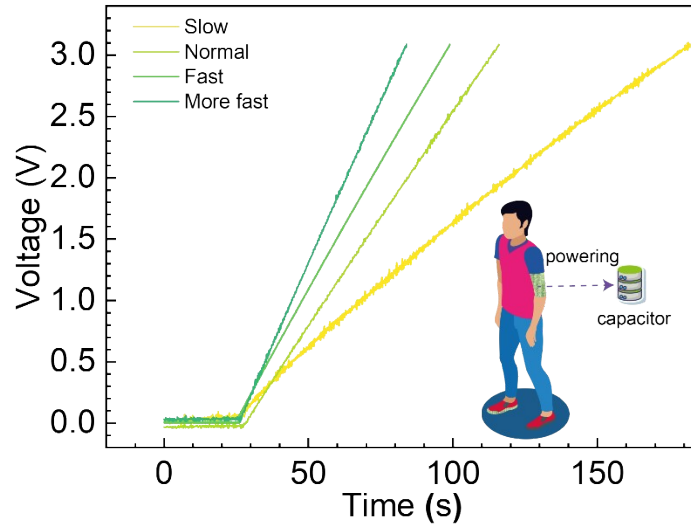

Fig. S25 | The charging characteristics of WDPs with 1 mF capacitor by harvesting biokinetic energies at different bending speeds.

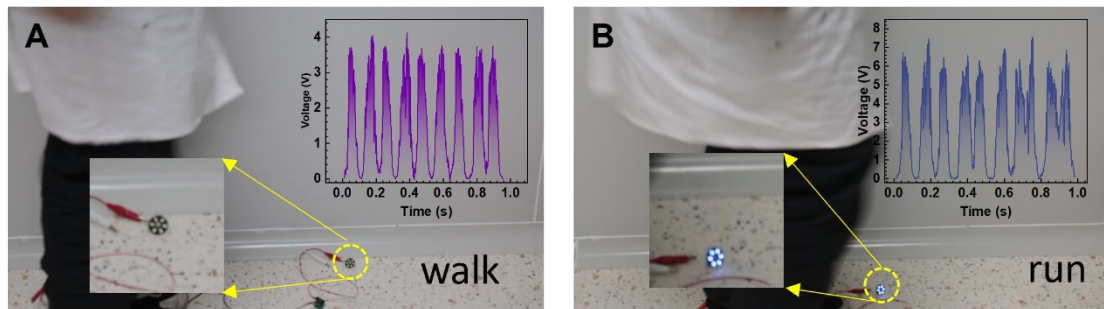

Fig. S26 | (A, B) The voltage generated by WDP under walking and running.

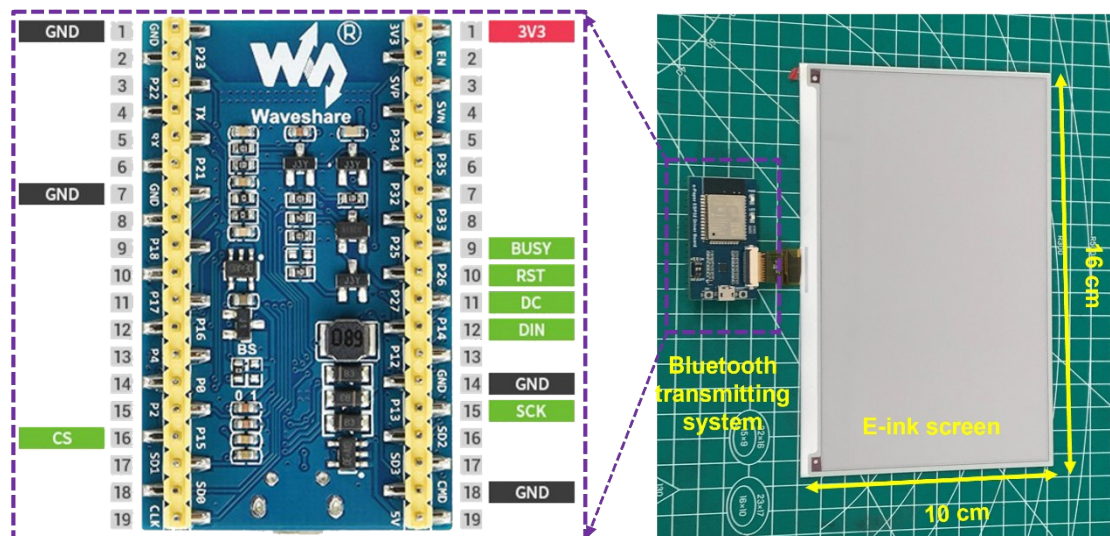

Fig. S27 | The bluetooth transmitting system and e-ink screen.



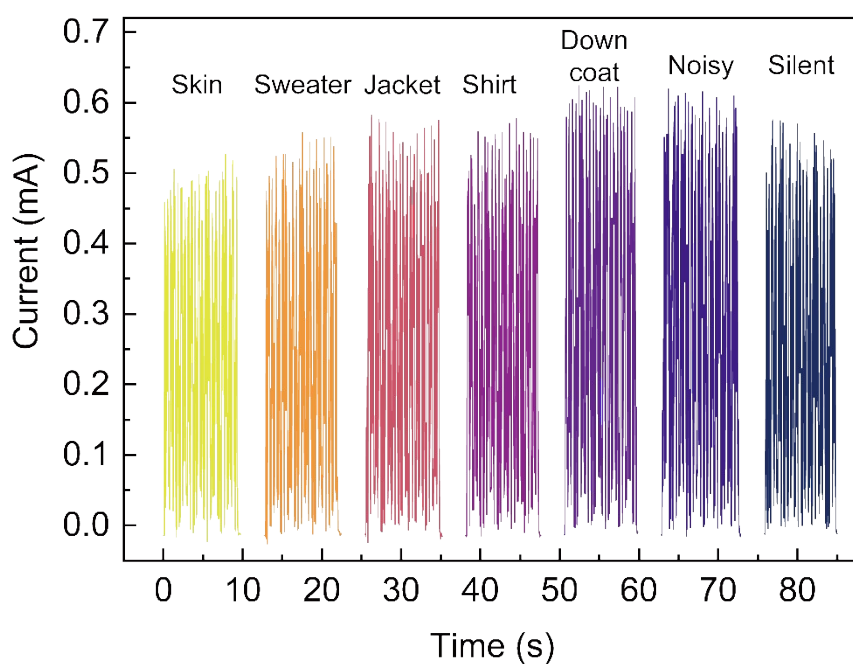

**Fig. S28** | The output of WDP on skin and different clothing materials.

**Table 1** The performance of different type TVNGs and TENGs

| Material              | TVNG/<br>TENG | DC/<br>AC | Textile | Hydrophobic | Flexibility | Stretchability | $V_{oc}$<br>(V) | Power density<br>(W/m <sup>2</sup> ) | Resistance<br>(M $\Omega$ ) | Durability<br>(Cycles) | Reference |
|-----------------------|---------------|-----------|---------|-------------|-------------|----------------|-----------------|--------------------------------------|-----------------------------|------------------------|-----------|
| Cu/PTFE               | TENG          | AC        | ✓       | ✗           | ✓           | ✗              | 6               | $1.25 \times 10^{-3}$                | 10                          | —                      | 11        |
| CNT/PTFE              | TENG          | AC        | ✓       | ✗           | ✓           | ✗              | 20              | $4 \times 10^{-3}$                   | 1000                        | 10000                  | 18        |
| Ag/PTFE               | TENG          | AC        | ✓       | ✗           | ✓           | ✗              | 900             | $2 \times 10^{-3}$                   | 100                         | —                      | 22        |
| Water/PTFE            | TENG          | AC        | ✗       | ✓           | ✗           | ✗              | 150             | 50.1                                 | 0.3                         | —                      | 32        |
| Ag/PDMS               | TENG          | AC        | ✓       | ✗           | ✓           | ✓              | 48              | —                                    | 2000                        | —                      | 12        |
| Graphene/<br>PDMS     | TENG          | AC        | ✓       | ✗           | ✓           | ✗              | 70              | $30 \times 10^{-3}$                  | 100                         | —                      | 23        |
| PE/PDMS               | TENG          | AC        | ✓       | ✓           | ✓           | ✓              | 200             | $0.8 \times 10^{-3}$                 | 1000                        | 5700                   | 21        |
| Ag/PDMS               | TENG          | AC        | ✓       | ✗           | ✓           | ✓              | 20              | $22 \times 10^{-6}$                  | 150                         | 1800                   | 27        |
| Conductive<br>yarn/PI | TENG          | AC        | ✓       | ✓           | ✓           | ✓              | 140             | $70 \times 10^{-6}$                  | 1000                        | —                      | 25        |
| Conductive            | TENG          | AC        | ✓       | ✓           | ✓           | ✓              | 0.12            | 0.12                                 | 10                          | 1000                   | 29        |

|                                                  |      |    |   |   |   |   |      |                       |        |       |              |
|--------------------------------------------------|------|----|---|---|---|---|------|-----------------------|--------|-------|--------------|
| polyamide/PI                                     |      |    |   |   |   |   |      |                       |        |       |              |
| Bi <sub>2</sub> Te <sub>3</sub> /Kapton          | TENG | AC | ✖ | ✖ | ✖ | ✖ | 50   | —                     | 30     | —     | 17           |
| Ag/PE                                            | TENG | AC | ✓ | ✖ | ✖ | ✓ | 40   | 10.5×10 <sup>-3</sup> | 1000   | 10000 | 28           |
| Ag/Nylon                                         | TENG | AC | ✓ | ✖ | ✓ | ✓ | 20   | 2.2×10 <sup>-3</sup>  | 20     | 10000 | 20           |
| Ag/EP                                            | TENG | AC | ✓ | ✖ | ✖ | ✓ | 18   | 0.7                   | 24     | —     | 24           |
| Conductive<br>yarn/PAN:PVDF                      | TENG | AC | ✓ | ✓ | ✓ |   | 30   | 350×10 <sup>-6</sup>  | 500    | —     | 26           |
| n-SWCNT/ p-<br>SWCNT                             | TVNG | DC | ✓ | ✖ | ✖ | ✖ | 0.3  | —                     | 3.3    | 1280  | 47           |
| GaN/Bi <sub>2</sub> Te <sub>3</sub>              | TVNG | DC | ✖ | ✖ | ✖ | ✖ | 48   | 11.85                 | 0.16   | —     | 53           |
| MoS <sub>2</sub> /Ta <sub>4</sub> C <sub>3</sub> | TVNG | DC | ✓ | ✖ | ✓ | ✖ | 0.3  | 37×10 <sup>-3</sup>   | 0.55   | 54000 | 41           |
| Al/PEDOT:PSS                                     | TVNG | DC | ✓ | ✖ | ✓ | ✖ | 0.6  | —                     | —      | 4000  | 33           |
| Al/PEDOT:PSS                                     | TVNG | DC | ✖ | ✖ | ✓ | ✖ | 2    | —                     | 0.2    | 20000 | 34           |
| Al/PEDOT:PSS                                     | TVNG | DC | ✓ | ✖ | ✓ | ✖ | 0.45 | 1.2×10 <sup>-3</sup>  | 30     | 3350  | 42           |
| Al/PEDOT:PSS                                     | TVNG | DC | ✓ | ✖ | ✓ | ✖ | 0.8  | 0.13                  | 0.01   | 5000  | 43           |
| Al/PPy                                           | TVNG | DC | ✓ | ✖ | ✖ | ✖ | 0.4  | 0.17                  | 0.43   | 20000 | 45           |
| Au/PPy                                           | TVNG | DC | ✖ | ✖ | ✓ | ✖ | 0.7  | 0.15                  | 0.0082 | —     | 46           |
| PBFD/<br>PEDOT:PF                                | TVNG | DC | ✓ | ✓ | ✓ | ✓ | 40   | 1.05                  | 0.035  | 72000 | This<br>work |

**Video.S1.** The  $V_{oc}$  of WDPs.

**Video.S2.** The  $I_{sc}$  of WDPs.

**Video.S3.** The WDPs charge a commercial lithium-ion battery at 5 Hz.

**Video.S4.** The WDPs charge drive the 25, 32, and 40 V colored electric lamps at 3 Hz, 4Hz and 5 Hz.

**Video.S5.** The WDPs drive the 3, 10, and 20 V colored lights by harvesting the kinetic energy of the human body.

**Video.S6.** The WDPs drive a 25 mW mobile phone, a10 mW smart bracelet and a 8 mW thermo-hygrometer by harvesting the kinetic energy of the human body.

**Video.S7.** The WDPs charge a 1 mF capacitor by harvesting the kinetic energy of the human body.

**Video.S8.** The WDPs drive the bluetooth transmitting system ([Fig. S27](#)) and the e-ink screen.
